# Supplementary material
Source: PubMed Central journal article supplement (PMC5819424)
Supplement: pnas.201716418SI.pdf [file pnas.201716418SI.pdf]

# Supporting Information

Haddad et al. 10.1073/pnas.1716418115

## X-Ray Measurements

The X-ray measurements comprised reflectivity (XR), GISAXS, and transmission-mode bulk SAXS. The scattering geometries for these methods are shown in Fig. S1. For all geometries, the wave vectors fulfill  $|\vec{k}_{in}| = |\vec{k}_{out}| = 2\pi/\lambda$ , where  $\lambda$  is the X-rays' wavelength, and the scattering vector is  $\vec{q} = \vec{k}_{out} - \vec{k}_{in}$ . We discuss here briefly only those features which are not available in standard textbooks (1–5), and which are required for the understanding the discussion in the main text.

**X-Ray Reflectivity.** The geometry for this method is shown in Fig. S1A. Since  $\vec{q} = \vec{q}_z$  for this geometry, XR probes the laterally averaged surface-normal EDP,  $\rho_e(z)$ . XR measurements record the reflected intensity fraction,  $R(q_z)$ , of an X-ray beam incident on (and reflected from) the surface at a grazing angle  $\alpha$  as a function of the surface-normal scattering vector  $q_z = (4\pi/\lambda) \sin(\alpha)$ . **Theory.**  $R(q_z)$  and  $\rho_e(z)$  are related through the Born approximation for weak reflections by (1, 2)

$$R(q_z)/R_F(q_z) = \left| \rho_b^{-1} \int (d\rho_e(z)/dz) \exp(-iq_z z) dz \right|^2, \quad [\text{S1}]$$

where  $\rho_b$  is the bulk electron density, and  $R_F(q_z)$  is the Fresnel reflectivity from an ideally flat and abrupt interface. To extract  $\rho_e(z)$  from the measured  $R(q_z)$ , a physically motivated model for  $\rho_e$  is constructed, and the corresponding analytic  $R(q_z)$  is calculated using Eq. S1. Fitting this calculated curve to the measured  $R(q_z)$  yields the model-defining parameter values (6).

**Model.** We adopt here the modified DCM used successfully for layered liquid metal (7–10) and ionic liquid (11–14) interfaces,

$$\rho_e(z) = \rho_b \sum_{m=0}^{\infty} \frac{d}{\sigma_m \sqrt{2\pi}} \exp \left[ -\frac{(z - md)^2}{2\sigma_m^2} \right] + \rho_a \frac{d}{\sigma_a \sqrt{2\pi}} \exp \left[ -\frac{(z + d_0)^2}{2\sigma_a^2} \right]. \quad [\text{S2}]$$

This model represents  $\rho_e(z)$  by  $d$ -spaced layers of a Gaussian electron density distribution with an effective width  $\sigma_m = \sqrt{\sigma_0^2 + m\bar{\sigma}^2}$ . As  $m$  increases, the Gaussians broaden, reducing smoothly the oscillatory deviations of  $\rho_e(z)$  from the bulk density  $\rho_b$ . Here  $\sigma_0$  is the surface roughness (including the contributions from thermal capillary waves and any nonthermal intrinsic roughness), and  $\bar{\sigma}$  controls the layering decay length by controlling the broadening of the Gaussians. The second term represents the enrichment of the layer of alkyl chains (at an average position  $d_0$ , a width  $\sigma_a$ , and density  $\rho_a$ ) protruding from the first cation layer into the air.

**Fits.** The fits were conducted in two rounds. In the first round, all parameters of the model were free to vary, yielding good fits. The values of  $\bar{\sigma}$  were found to be narrowly clustered around 7 Å for all  $n \geq 6$ , except  $n = 20, 22$ . For  $n \leq 4$ ,  $\rho_a$  converged to 0, and  $\bar{\sigma}$  decreased significantly with decreasing  $n$ , reaching  $\bar{\sigma} \approx 2$  Å for  $n = 2$ . The  $\bar{\sigma}$  decrease was accompanied by a concomitant decrease in  $d$ , to values close to  $\bar{\sigma}$ , rendering the resultant  $\rho_e(z)$  devoid of modulations, and simple-liquid-like, as dictated by the shape of the measured  $n \leq 4$  XR curves, discussed in the main text.

Based on the results of the first round, in the second round of fits for  $n \leq 6$ , a fixed  $\rho_a = 0 \text{ e}/\text{Å}^3$  was used and all parameters of the first term in Eq. S2 were all allowed to vary. For  $6 \leq n \leq 18$ , a fixed  $\bar{\sigma} = 7$  Å was used, and all other parameters, including those of the second term of Eq. S2, were allowed to vary. For

$n = 20$  and  $22$ , the fits obtained for  $\bar{\sigma} = 7$  Å were poor. Thus, for these  $n$ ,  $\bar{\sigma}$  was also allowed to vary and yielded  $\bar{\sigma} = 7.7$  and  $7.4$  Å, respectively. The values obtained from this round of fits are the ones shown and discussed in the main text. We also note that  $n = 6$  constitutes a special case. Here the measured XR could be fit equally well either by fixing  $\bar{\sigma} = 7$  Å and allowing  $d$  and  $\rho_a$  to vary, as for all  $n \geq 6$ , or by fixing  $\rho_a = 0 \text{ e}/\text{Å}^3$  and allowing  $d$  and  $\bar{\sigma}$  to vary, as for all  $n \leq 4$ . Coinciding curves were obtained for the  $n = 6$  XR fits and EDPs using the two methods. The curves shown for  $n = 6$  in Fig. 1A and B were obtained by the latter method.

**GISAXS.** The geometry for this measurement mode is shown in Fig. S1B. Here the detector is offset from the reflection plane  $x$ - $z$  by an angle  $2\theta$  to pick up X-rays scattered with the scattering vector  $\vec{q}$ . As  $\vec{q}$  now has a component in the horizontal  $x$ - $y$  plane, it is sensitive to order in that plane. Thus, long-range surface-parallel order will produce sharp peaks, known as GID peaks, upon scanning  $2\theta$ . Such peaks were not found for any  $n$  or temperature in our measurements. An LL short-range order will produce broad diffuse peaks. When several different correlation distances  $D_n$  exist in the liquid, several diffuse rings with radii  $q_n = 2\pi/D_n$  will be observed in the registration plane  $y$ - $z$ . Circular averaging over the intensities in the registration plane yields, in that case, the GISAXS intensity patterns shown in Fig. 4, exhibiting two peaks, corresponding to two different correlation lengths  $D_n$ . The lowest- $q$  peak of the bulk SAXS, denoted in Fig. 4 as Peak I (see below), was not accessible in the GISAXS geometry in our measurements.

It is important to note that the scattering volume sampled by the incident X-ray beam, and its vertical position, varies with  $\alpha$ . An interface between two media of different refractive indices splits an incident beam into reflected and refracted beams. The RTILs' refractive index for X-rays is less than unity, while that of air is unity. Thus, by Snell's law of optics, an angle  $\alpha_c$  exists for the RTIL-air interface such that, when  $\alpha < \alpha_c$ , the refracted beam becomes evanescent and penetrates only to a depth  $\Lambda \approx [\lambda/(4\pi)]/\sqrt{\alpha_c^2 - \alpha^2}$  below the surface. When  $\alpha > \alpha_c$ , the refracted beam penetrates to macroscopic depths below the surface, and thus samples the RTIL's bulk. In our case,  $\alpha_c = 0.057^\circ$ , and the GISAXS measurements were carried out below ( $\alpha_1 = 0.045^\circ$ ; Fig. 4, blue symbols) and above ( $\alpha_2 = 0.15^\circ$ ; Fig. 4, red symbols)  $\alpha_c$ . These  $\alpha$  yield, respectively,  $\Lambda \approx 70$  Å, where predominantly the layered surface region is sampled, and a macroscopic penetration, where the bulk is sampled.

**Transmission-Mode SAXS.** The geometry for this case is shown in Fig. S1C. The incident beam travels along the  $x$  axis, and is scattered through the  $z$ -axis-oriented sample contained in a capillary, yielding, for a liquid, equal- $q$  circles in the registration plane  $y$ - $z$ . As for GISAXS, an LL short-range order will produce diffuse rings in this plane. When several different correlation distances  $D_n$  exist in the liquid, several diffuse rings with radii  $q_n = 2\pi/D_n$  will be observed in the registration plane. Fixed- $q$  circular averaging over the SAXS pattern yields an intensity versus  $q$  plot, such as that shown in black symbols in Fig. 4, with peak positions corresponding to the bulk correlation periods.

## Melting Temperatures of Long-Chain RTILs

$[C_n\text{mim}][\text{NTf}_2]$  RTILs with  $n \geq 14$  melt above RT ( $\sim 25^\circ\text{C}$ ). Note, however, that, once molten, RTILs can be undercooled

significantly, up to tens of degrees, and for long (cooling-dependent) times, before they solidify. Thus, it is possible to obtain liquid phases at RT even for some of the  $n \geq 14$  RTILs.

1. Pershan PS, Schlossman ML (2012) *Liquid Surfaces and Interfaces: Synchrotron X-ray Methods* (Cambridge Univ Press, Cambridge, UK).
2. Als-Nielsen J, McMorrow D (2001) *Elements of Modern X-Ray Physics* (Wiley, New York).
3. Guinier A, Fournet G (1955) *Small-Angle Scattering of X-Rays* (Wiley, New York).
4. Feigin LA, Svergun DI (1982) *Small-Angle X-Ray Scattering* (Academic, New York).
5. Feigin LA, Svergun DI (1987) *Structure Analysis by Small-Angle X-Ray and Neutron Scattering* (Plenum, New York).
6. Ocko BM, et al. (1997) Surface freezing in chain molecules: Normal alkanes. *Phys Rev E* 55:3164–3182.
7. Magnussen OM, et al. (1995) X-ray reflectivity measurements of surface layering in liquid mercury. *Phys Rev Lett* 74:4444–4447.
8. DiMasi E, Tostmann H, Ocko BM, Pershan PS, Deutsch M (1998) X-ray reflectivity study of temperature-dependent surface layering in liquid Hg. *Phys Rev B* 58:R13419–R13422.
9. Elsen A, et al. (2010) Surface layering at the mercury-electrolyte interface. *Phys Rev Lett* 104:105501.
10. Elsen A, et al. (2013) In situ X-ray studies of a layer-induced crystal nucleation at the liquid–liquid interface. *Proc Natl Acad Sci USA* 110:6663–6668.
11. Mezger M, et al. (2008) Molecular layering of fluorinated ionic liquids at a charged sapphire (0001) surface. *Science* 322:424–428.
12. Nishi N, et al. (2010) Ionic multilayers at the free surface of an ionic liquid, trioctylmethylammonium bis(nonafluorobutanesulfonyl)amide, probed by X-ray reflectivity measurements. *J Chem Phys* 132:164705.
13. Mezger M, Ocko BM, Reichert H, Deutsch M (2013) Surface layering and melting in an ionic liquid studied by resonant soft X-ray reflectivity. *Proc Natl Acad Sci USA* 110:3733–3737.
14. Mezger M, et al. (2015) Solid-liquid interfaces of ionic liquid solutions: Interfacial layering and bulk correlations. *J Chem Phys* 142:164707.
15. Zhang S, Sun N, He X, Lu X, Zhang X (2006) Physical properties of ionic liquids: Database and evaluation. *J Phys Chem Ref Data* 35:1475–1517.
16. Bradley AE, et al. (2002) Small-angle X-ray scattering studies of liquid crystalline 1-alkyl-3-methylimidazolium salts. *Chem Mat* 14:629–635.

Melting temperatures  $T_m$  for  $n = 12$  to 18 [literature values (15, 16)] and  $n = 20$  to 22 [differential scanning calorimetry (DSC)-measured, at 5 K/min] are listed in Table S1.



**Table S1. Melting temperatures  $T_m$  of  $[C_n\text{mim}][\text{NTf}_2]$  RTILs**

| $n$ | $T_m(^{\circ}\text{C})$ |
|-----|-------------------------|
| 12  | 16.7                    |
| 14  | 34.3                    |
| 16  | 42.1                    |
| 18  | 44.8                    |
| 20  | 57.7                    |
| 22  | 65.7                    |
